# Supplementary material
Source: PubMed Central journal article supplement (PMC5496037)
Supplement: 10.1194_M075713_jlr.M075713-1.pdf [file 10.1194_M075713_jlr.M075713-1.pdf]

## Supplementary materials for:

### **Modulation of the gut microbiota impacts non-alcoholic fatty liver disease: a potential role for bile acids**

Aafke WF Janssen<sup>1</sup>, Tom Houben<sup>2</sup>, Saeed Katiraei<sup>3</sup>, Wieneke Dijk<sup>1</sup>, Lily Boutens<sup>1,4</sup>, Nieke van der Bolt<sup>1</sup>, Zeneng Wang<sup>5</sup>, J Mark Brown<sup>5</sup>, Stanley L Hazen<sup>5</sup>, Stéphane Mandard<sup>6</sup>, Ronit Shiri-Sverdlov<sup>2</sup>, Folkert Kuipers<sup>7</sup>, Ko Willems van Dijk<sup>3,8</sup>, Jacques Vervoort<sup>9</sup>, Rinke Stienstra<sup>1,4</sup>, Guido JEJ Hooiveld<sup>1</sup>, Sander Kersten<sup>1</sup>

<sup>1</sup>Nutrition, Metabolism and Genomics Group, Wageningen University, 6708 WE Wageningen, The Netherlands

<sup>2</sup>Department of Molecular Genetics, Maastricht University, 6200 MD Maastricht, The Netherlands

<sup>3</sup>Department of Human Genetics, Leiden University Medical Center, 2300 RC Leiden, The Netherlands

<sup>4</sup>Department of Medicine, Radboud University Medical Center, 6525 GA Nijmegen, The Netherlands

<sup>5</sup>Department of Cellular and Molecular Medicine, Cleveland Clinic Lerner Research Institute, Cleveland, Ohio 44195, USA

<sup>6</sup>Lipness Team-INSERM Research Center UMR1231 and LabEx LipSTIC, Faculté de Médecine, Université de Bourgogne-Franche Comté, 21079 Dijon CEDEX, France

<sup>7</sup>Department of Pediatrics, University Medical Center Groningen, 9713 GZ Groningen, The Netherlands

<sup>8</sup>Department of Medicine, Leiden University Medical Center, 2300 RC Leiden, The Netherlands

<sup>9</sup>Laboratory of Biochemistry, Wageningen University, 6708 WE Wageningen, The Netherlands

**Correspondence should be addressed to:** Sander Kersten, PhD, Nutrition, Metabolism and Genomics group, Division of Human Nutrition, Wageningen University, Stippeneng 4, 6708 WE Wageningen, The Netherlands. Phone: +31 317 485787; Email: [sander.kersten@wur.nl](mailto:sander.kersten@wur.nl).

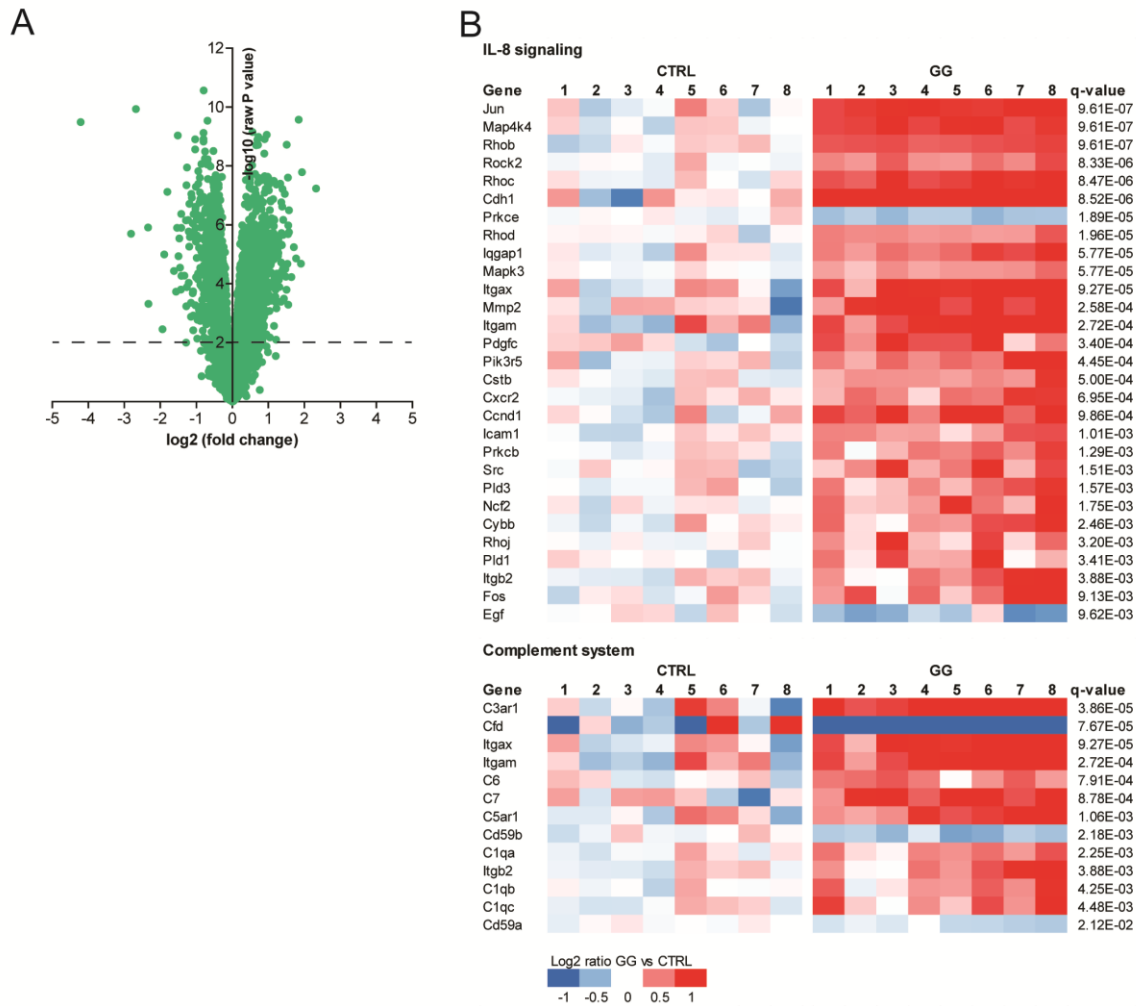

**Supplemental figure 1. Guar gum alters IL-8 signaling and complement system activation**

(A) Volcano plot displaying relative changes in expression of 21115 genes (x axis) plotted against statistical significance (y axis) upon GG feeding. Dotted line represents cut-off for  $p < 0.01$ . (B) Heat map showing significant changes in expression of genes involved in IL-8 signaling and complement system activation in the livers of CTRL and GG mice. The Log<sub>2</sub> expression signals of the CTRL group was arbitrarily set at 0.

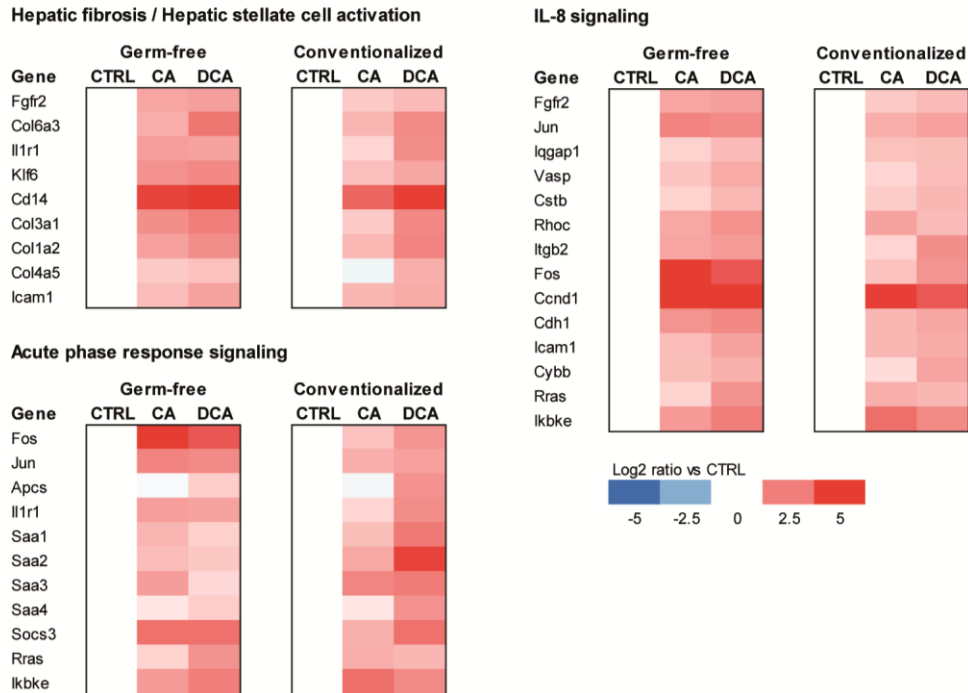

**Supplemental figure 2. Effect of cholic acid and deoxycholic acid on hepatic genome-wide expression**

Heat maps showing changes in expression of genes involved in hepatic fibrosis/hepatic stellate cell activation, IL-8 signaling and acute phase response signalling in the livers of germ-free and conventionalized mice fed either a CTRL diet or supplemented with 0.5% CA or 0.5% DCA for two weeks. The Log2 expression signals of CTRL was arbitrarily set at 0.

**Supplemental Table 1. Macronutrient and ingredient composition of various diets based on formula D12451 study 1**

|                     | Control      |             | Resistant starch |             | Guar Gum     |             |
|---------------------|--------------|-------------|------------------|-------------|--------------|-------------|
|                     | g%           | kcal%       | g%               | kcal%       | g%           | kcal%       |
| Protein             | 24           | 20          | 24               | 21          | 24           | 20          |
| Carbohydrate        | 41           | 35          | 41               | 32          | 41           | 35          |
| Fat                 | 24           | 45          | 24               | 47          | 24           | 45          |
| Total               |              | 100         |                  | 100         |              | 100         |
| kcal/g              | 4.7          |             | 4.7              |             | 4.7          |             |
| <b>Ingredient</b>   | <b>g</b>     | <b>kcal</b> | <b>g</b>         | <b>kcal</b> | <b>g</b>     | <b>kcal</b> |
| Casein, 30 Mesh     | 200          | 800         | 200              | 800         | 200          | 800         |
| L-Cystine           | 3            | 12          | 3                | 12          | 3            | 12          |
| Corn Starch         | 72.8         | 291         | 0                | 0           | 0            | 0           |
| Resistant Starch    | 0            | 0           | 86.7             | 173.4       | 0            | 0           |
| Guar Gum            | 0            | 0           | 0                | 0           | 86.7         | 346.8       |
| Maltodextrin 10     | 100          | 400         | 86.1             | 344.4       | 86.1         | 344.4       |
| Sucrose             | 172.8        | 691         | 172.8            | 691         | 172.8        | 691         |
| Cellulose, BW200    | 50           | 0           | 50               | 0           | 50           | 0           |
| Soybean Oil         | 25           | 225         | 25               | 225         | 25           | 225         |
| Safflower Oil       | 177.5        | 1598        | 177.5            | 1598        | 177.5        | 1598        |
| Cholesterol         | 8.66         | 0           | 8.66             | 0           | 8.66         | 0           |
| Mineral Mix S10026  | 10           | 0           | 10               | 0           | 10           | 0           |
| DiCalcium Phosphate | 13           | 0           | 13               | 0           | 13           | 0           |
| Calcium Carbonate   | 5.5          | 0           | 5.5              | 0           | 5.5          | 0           |
| Patassium Citrate   | 16.5         | 0           | 16.5             | 0           | 16.5         | 0           |
| Vitamin Mix V10001  | 10           | 40          | 10               | 40          | 10           | 40          |
| Choline Bitartrate  | 2            | 0           | 2                | 0           | 2            | 0           |
| <b>Total</b>        | <b>866.8</b> | <b>4057</b> | <b>866.8</b>     | <b>3884</b> | <b>866.8</b> | <b>4057</b> |

**Supplemental Table 2. Primer sequences used for qPCR**

| Name            | Primer Sequence        |                          |
|-----------------|------------------------|--------------------------|
|                 | Forward                | Reverse                  |
| <i>m36b4</i>    | ATGGGTACAAGCGCGTCCTG   | GCCTTGACCTTTTCAGTAAG     |
| <i>mβ-actin</i> | GATCTGGCACCACACCTTCT   | GGGGTGTGAAGGTCTCAA       |
| <i>mCd68</i>    | CCAATTCAGGGTGAAGAAA    | CTCGGGCTCTGATGTAGTC      |
| <i>mF4/80</i>   | CTTTGGCTATGGGCTTCCAGTC | GCAAGGAGGACAGAGTTTATCGTG |
| <i>mCd11c</i>   | CTGGATAGCCTTTCTTCTGCTG | GCACACTGTGTCCGAACTCA     |
| <i>mCd206</i>   | GCTTCCGTCACCCTGTATGC   | GTGTGTCATTCTTACACTCCC    |
| <i>mMcp-1</i>   | CCCAATGAGTAGGCTGGAGA   | TCTGGACCCATTCTTCTTG      |
| <i>mTnfa</i>    | CAACCTCCTCTCTGCCGTC    | TGACTCCAAAGTAGACCTGCCC   |
| <i>mIl-10</i>   | CTGGACAACATACTGCTAACC  | GGGCATCACTTCTACCAGGTAA   |
| <i>mCol1a1</i>  | TGTGTGCGATGACGTGCAAT   | GGGTCCCTCGACTCCTACA      |
| <i>maSma</i>    | GTCCCAGACATCAGGGAGTAA  | TCGGATACTTCAGCGTCAGGA    |
| <i>mTimp1</i>   | GCAACTCGGACCTGGTCATAA  | CGGCCCGTGATGAGAACT       |
| <i>mCyp7a1</i>  | CAGGGAGATGCTCTGTGTTCA  | AGGCATACATCCCTTCCGTGA    |
| <i>mCyp27a1</i> | GCCTTGACACAAGGAAGTGACT | CGCAGGGTCTCCTTAATCACA    |
| <i>mCyp8b1</i>  | CCTCTGGACAAGGGTTTTGTG  | GCACCGTGAAGACATCCCC      |
| <i>mSlc51b</i>  | AGATGCGGCTCCTTGAATTA   | TGGCTGCTTCTTCGATTCTG     |
| <i>mNtcp</i>    | ATGACCACCTGCTCCAGCTT   | GCCTTTGTAGGGCACCTTGT     |
| <i>mBsep</i>    | CTGCCAAGGATGCTAATGCA   | CGATGGCTACCCTTTGCTTCT    |
| <i>mFgf15</i>   | GCTCTGAAGACGATTGCCATC  | TTCCTCCCTGAAGGTACAGTC    |
| <i>mAsbt</i>    | ATGGCGACATGGACCTCAGT   | CCCGAGTCAACCCACATCTTG    |
| <i>mlbabp</i>   | CTTCCAGGAGACGTGATTGAAA | CCTCCGAAGTCTGGTGATAGTTG  |
| <i>mSlc51a</i>  | GTTCCAGGTGCTTGCATCC    | CCACTGTTAGCCAAGATGGAGAA  |

**Supplemental Table 3. Relative abundance of microbiota in colonic luminal content study 1**

| Phylum          | Class               | Order              | Family              | Genus                           | Species | CTRL (%) | RS (%) | GG (%) | FC RS* | P-value RS** | FC GG*  | P-value GG** |
|-----------------|---------------------|--------------------|---------------------|---------------------------------|---------|----------|--------|--------|--------|--------------|---------|--------------|
| Actinobacteria  |                     |                    |                     |                                 |         | 0,26     | 1,54   | 15,63  | 5,9    | 0,012        | 59,2    | p<0,001      |
|                 | Actinobacteria      |                    |                     |                                 |         | 0,26     | 1,54   | 15,63  | 5,9    | 0,012        | 59,2    | p<0,001      |
|                 |                     | Bifidobacteriales  |                     |                                 |         | 0,26     | 1,54   | 15,63  | 5,9    | 0,012        | 59,2    | p<0,001      |
|                 |                     |                    | Bifidobacteriaceae  |                                 |         | 0,26     | 1,54   | 15,63  | 5,9    | 0,012        | 59,2    | p<0,001      |
|                 |                     |                    |                     | <i>Bifidobacterium</i>          |         | 0,26     | 1,54   | 15,63  | 5,9    | 0,012        | 59,2    | p<0,001      |
| Bacteroidetes   |                     |                    |                     |                                 |         | 4,51     | 17,16  | 14,49  | 3,8    | 0,002        | 3,2     | p<0,001      |
|                 | Bacteroidia         |                    |                     |                                 |         | 4,51     | 17,16  | 14,49  | 3,8    | 0,002        | 3,2     | p<0,001      |
|                 |                     | Bacteroidales      |                     |                                 |         | 4,51     | 17,16  | 14,49  | 3,8    | 0,002        | 3,2     | p<0,001      |
|                 |                     |                    | Unidentified        |                                 |         | 2,18     | 5,70   | 0,52   | 2,6    | 0,038        | -4,2    | 0,002        |
|                 |                     |                    | Paraprevotellaceae  |                                 |         | 0,12     | 0,09   | 3,24   | -1,3   | 0,046        | 27,2    | p<0,001      |
|                 |                     |                    |                     | <i>Prevotella</i>               |         | 0,12     | 0,09   | 3,24   | -1,3   | 0,046        | 27,2    | p<0,001      |
|                 |                     |                    | Bacteroidaceae      |                                 |         | 1,21     | 3,94   | 5,26   | 3,2    | 0,01         | 4,3     | 0,002        |
|                 |                     |                    |                     | <i>Bacteroides</i>              |         | 1,21     | 3,94   | 5,26   | 3,2    | 0,01         | 4,3     | 0,002        |
|                 |                     |                    | S24-7               |                                 |         | 0,99     | 7,43   | 5,47   | 7,5    | 0,001        | 5,5     | p<0,001      |
|                 |                     |                    |                     | <i>Unidentified</i>             |         | 0,99     | 7,43   | 5,47   | 7,5    | 0,001        | 5,5     | p<0,001      |
| Deferribacteres |                     |                    |                     |                                 |         | 4,95     | 1,71   | 1,12   | -2,9   | 0,038        | -4,4    | 0,006        |
|                 | Deferribacteres     |                    |                     |                                 |         | 4,95     | 1,71   | 1,12   | -2,9   | 0,038        | -4,4    | 0,006        |
|                 |                     | Deferribacteriales |                     |                                 |         | 4,95     | 1,71   | 1,12   | -2,9   | 0,038        | -4,4    | 0,006        |
|                 |                     |                    | Deferribacteraceae  |                                 |         | 4,95     | 1,71   | 1,12   | -2,9   | 0,038        | -4,4    | 0,006        |
|                 |                     |                    |                     | <i>Mucispirillum</i>            |         | 4,95     | 1,71   | 1,12   | -2,9   | 0,038        | -4,4    | 0,006        |
|                 |                     |                    |                     | <i>Mucispirillum schaedleri</i> |         | 4,95     | 1,71   | 1,12   | -2,9   | 0,038        | -4,4    | 0,006        |
| Firmicutes      |                     |                    |                     |                                 |         | 84,63    | 74,76  | 55,43  | -1,1   | 0,016        | -1,5    | p<0,001      |
|                 | Bacilli             |                    |                     |                                 |         | 9,99     | 1,88   | 0,62   | -5,3   | 0,012        | -16,1   | p<0,001      |
|                 |                     | Lactobacillales    |                     |                                 |         | 9,99     | 1,88   | 0,62   | -5,3   | 0,012        | -16,1   | p<0,001      |
|                 |                     |                    | Lactobacillaceae    |                                 |         | 9,99     | 1,88   | 0,62   | -5,3   | 0,012        | -16,1   | p<0,001      |
|                 |                     |                    |                     | <i>Lactobacillus</i>            |         | 9,99     | 1,88   | 0,62   | -5,3   | 0,012        | -16,1   | p<0,001      |
|                 | Clostridia          |                    |                     |                                 |         | 26,58    | 9,61   | 9,94   | -2,8   | 0,002        | -2,7    | 0,001        |
|                 |                     | Clostridiales      |                     |                                 |         | 26,58    | 9,61   | 9,94   | -2,8   | 0,002        | -2,7    | 0,001        |
|                 |                     |                    | Unidentified        |                                 |         | 17,87    | 3,99   | 6,34   | -4,5   | 0,001        | -2,8    | 0,006        |
|                 |                     |                    | Clostridiaceae      |                                 |         | 4,09     | 3,03   | 0,00   | -1,3   | ns           | -2275,9 | 0,001        |
|                 |                     |                    |                     | <i>SMB53</i>                    |         | 4,09     | 3,03   | 0,00   | -1,3   | ns           | -2275,9 | 0,001        |
|                 |                     |                    | Lachnospiraceae     |                                 |         | 1,70     | 1,56   | 3,19   | -1,1   | ns           | 1,9     | ns           |
|                 |                     |                    |                     | <i>Unidentified</i>             |         | 1,40     | 1,28   | 2,16   | -1,1   | ns           | 1,5     | ns           |
|                 |                     |                    |                     | <i>Ruminococcus</i>             |         | 0,30     | 0,27   | 1,03   | -1,1   | ns           | 3,4     | ns           |
|                 |                     |                    |                     | <i>Ruminococcus gnavus</i>      |         | 0,30     | 0,27   | 1,03   | -1,1   | ns           | 3,4     | ns           |
|                 |                     |                    | Ruminococcaceae     |                                 |         | 2,92     | 1,04   | 0,41   | -2,8   | ns           | -7,2    | p<0,001      |
|                 |                     |                    |                     | <i>Oscillospira</i>             |         | 2,92     | 1,04   | 0,41   | -2,8   | ns           | -7,2    | p<0,001      |
|                 | Erysipelotrichi     |                    |                     |                                 |         | 48,06    | 63,27  | 44,87  | 1,3    | ns           | -1,1    | ns           |
|                 |                     | Erysipelotrichales |                     |                                 |         | 48,06    | 63,27  | 44,87  | 1,3    | ns           | -1,1    | ns           |
|                 |                     |                    | Erysipelotrichaceae |                                 |         | 48,06    | 63,27  | 44,87  | 1,3    | ns           | -1,1    | ns           |
|                 |                     |                    |                     | <i>Allobaculum</i>              |         | 48,06    | 63,27  | 44,87  | 1,3    | ns           | -1,1    | ns           |
| Proteobacteria  |                     |                    |                     |                                 |         | 5,51     | 4,81   | 5,10   | -1,1   | ns           | -1,1    | ns           |
|                 | Deltaproteobacteria |                    |                     |                                 |         | 5,51     | 4,81   | 5,10   | -1,1   | ns           | -1,1    | ns           |
|                 |                     | Desulfovibrionales |                     |                                 |         | 5,51     | 4,81   | 5,10   | -1,1   | ns           | -1,1    | ns           |
|                 |                     |                    | Desulfovibrionaceae |                                 |         | 5,51     | 4,81   | 5,10   | -1,1   | ns           | -1,1    | ns           |
|                 |                     |                    |                     | <i>Bilophila</i>                |         | 3,08     | 2,22   | 1,53   | -1,4   | ns           | -2,0    | ns           |
|                 |                     |                    |                     | <i>Desulfovibrio</i>            |         | 2,43     | 2,59   | 3,56   | 1,1    | ns           | 1,5     | ns           |
|                 |                     |                    |                     | <i>Unidentified</i>             |         | 2,42     | 2,47   | 1,60   | 1,0    | ns           | -1,5    | ns           |
|                 |                     |                    |                     | <i>Desulfovibrio C21 c20</i>    |         | 0,00     | 0,12   | 1,97   | 83,2   | ns           | 1308,8  | 0,002        |
| Verrucomicrobia |                     |                    |                     |                                 |         | 0,14     | 0,01   | 8,23   | -17,3  | ns           | 60,8    | p<0,001      |
|                 | Verrucomicrobiae    |                    |                     |                                 |         | 0,14     | 0,01   | 8,23   | -17,3  | ns           | 60,8    | p<0,001      |
|                 |                     | Verrucomicrobiales |                     |                                 |         | 0,14     | 0,01   | 8,23   | -17,3  | ns           | 60,8    | p<0,001      |
|                 |                     |                    | Verrucomicrobiaceae |                                 |         | 0,14     | 0,01   | 8,23   | -17,3  | ns           | 60,8    | p<0,001      |
|                 |                     |                    |                     | <i>Akkermansia</i>              |         | 0,14     | 0,01   | 8,23   | -17,3  | ns           | 60,8    | p<0,001      |
|                 |                     |                    |                     | <i>Akkermansia muciniphila</i>  |         | 0,14     | 0,01   | 8,23   | -17,3  | ns           | 60,8    | p<0,001      |

Abundance threshold for presentation in the table >0.5% in at least one of the three diet groups

\* fold change (FC) compared with CTRL

\*\* significance according to Kruskal-Wallis test followed by unpaired Wilcoxon rank-sum test to test significance compared with CTRL
